# Supplementary material for: Molecular characterization of organic aerosols in the Kathmandu Valley, Nepal: insights into primary and secondary sources
Source: Copernicus journal article supplement (doi:10.5194/acp-19-2725-2019), 2019-03-04
Supplement: Supplementary file 2 [file acp-19-2725-2019-supplement.pdf]

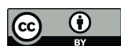

*Supplement of*

**Molecular characterization of organic aerosols in the Kathmandu Valley, Nepal: insights into primary and secondary sources**

**Xin Wan et al.**

*Correspondence to:* Zhiyuan Cong (zhiyuancong@itpcas.ac.cn)

The copyright of individual parts of the supplement might differ from the CC BY 4.0 License.

## 23    **Improvements for future studies**

24        There are additional improvements for future studies to be addressed.

25        **Firstly**, in our current study, we identified the organic tracers of biomass burning, plant-debris,  
26    fungal spores, biogenic secondary organic aerosols (BSOA) and aromatics-derived secondary organic  
27    aerosols. In order to explain the other sources of organic aerosols in the Kathmandu Valley, much more  
28    tracers need to be identified or if some new organic tracers special for the aerosols in the Kathmandu  
29    Valley, even better. **Secondly**, the conversion factors of tracers to organic carbon from local emissions  
30    and formation (e.g., hardwood combustion, BSOA formation, etc.) are critical for more precise source  
31    apportionments and therefore, it is valuable to increase the investigation of emission characteristics not  
32    only in the suburban region but also rural or urban regions. It would reduce the uncertainties of the source  
33    appointment using the tracer-based methods. **Thirdly**, comprehensive methods (e.g., carbon isotope and  
34    modeling) need to be integrated for the source apportionment of organic aerosols in the Kathmandu Valley.  
35    For example, constraints on primary and secondary particulate carbon sources using chemical tracers and  
36     $^{14}\text{C}$  methods have recently been used in many regions (e.g., California, East China, northern Italy, etc.)  
37    (Zhang et al., 2015;Liu et al., 2016;Bonvalot et al., 2016;Salma et al., 2017;Sheesley et al., 2017;Gilardoni  
38    et al., 2011). It will provide strong constraints on the relative contributions of the major sources of  
39    carbonaceous aerosols (both organic and black carbon), discriminating anthropogenic from natural, and  
40    primary from secondary aerosols. **Fourthly**, the results of the present study demonstrate that the biomass  
41    burning plays a significant role in atmospheric aerosols in the Kathmandu Valley, therefore, the influences  
42    of biomass burning on the formation of secondary organic aerosols could be further studied, especially  
43    during the heavily polluted dry season, with additional simultaneous measurements of precursors (e.g.,  
44     $\text{NO}_x$  and  $\text{O}_3$ ),  $\text{PM}_{2.5}$  and so on at the same time. **In addition**, knowledge of various chemical species in  
45    size-segregated aerosols is important for understanding the physical and chemical atmospheric processes  
46    that affect aerosol properties, especially during haze episodes. However, such studies are limited in the  
47    Kathmandu Valley, South Asia. Therefore, the size-resolved chemical investigations are especially needed

48 in the future. **Finally**, it is necessary to conduct a systematic and comprehensive study in Kathmandu  
49 Valley and South Asia to assess the potential positive and negative artifacts and corresponding impacts  
50 on the organic tracers.

Table S1 Recoveries and MDLs of the target compounds

| Compounds                         | Addition<br>(ppb) (n=6) | Recovery (%) | MDLs (ng m <sup>-3</sup> ) |
|-----------------------------------|-------------------------|--------------|----------------------------|
| Levoglucozan                      | 100                     | 81.6 ± 10.4  | 0.08                       |
| Mannosan                          | 100                     | 80.7 ± 11.7  | 0.07                       |
| Galactosan                        | 100                     | 76.3 ± 9.43  | 0.07                       |
| <i>p</i> -Hydroxybenzoic acid     | 100                     | 80.8 ± 9.78  | 0.07                       |
| Vanillic acid                     | 100                     | 79.4 ± 11.5  | 0.11                       |
| Syringic acid                     | 100                     | 78.6 ± 14.2  | 0.11                       |
| Dehydroabietic acid               | 100                     | 85.4 ± 13.4  | 0.11                       |
| Glucose                           | 100                     | 86.2 ± 13.2  | 0.05                       |
| Fructose                          | 100                     | 86.5 ± 9.57  | 0.06                       |
| Trehalose                         | 100                     | 80.9 ± 10.4  | 0.13                       |
| Sucrose                           | 100                     | 82.2 ± 12.6  | 0.08                       |
| Xylose                            | 100                     | 81.7 ± 10.1  | 0.09                       |
| Mannitol                          | 100                     | 80.6 ± 7.25  | 0.12                       |
| Arabitol                          | 100                     | 85.8 ± 8.57  | 0.06                       |
| Sorbitol                          | 100                     | 77.5 ± 11.1  | 0.12                       |
| Erythritol                        | 100                     | 90.8 ± 3.80  | 0.07                       |
| Diethyl                           | 100                     | 87.7 ± 10.0  | 0.12                       |
| Di-n-butyl                        | 100                     | 89.5 ± 11.5  | 0.12                       |
| Bis-(2-ethylhexy)                 | 100                     | 89.9 ± 5.36  | 0.12                       |
| Malic acid                        | 100                     | 76.4 ± 5.44  | 0.13                       |
| Pinic acid                        | 100                     | 76.1 ± 7.85  | 0.10                       |
| cis-Pinonic acid                  | 100                     | 73.9 ± 5.00  | 0.08                       |
| Azelaic acid                      | 100                     | 87.2 ± 6.77  | 0.11                       |
| Methyl-β-D-xylanopyranoside       | 100                     | 90.1 ± 13.2  |                            |
| <i>D</i> <sub>3</sub> -malic acid | 100                     | 70.5 ± 14.6  |                            |

Table S2 Estimation of measurement uncertainty

| Tracers                                          | Tracer formula                                 | Surrogates               | Surrogate formula                              | EQ (%) | <sup>a</sup> ER (%) | EA (%) |
|--------------------------------------------------|------------------------------------------------|--------------------------|------------------------------------------------|--------|---------------------|--------|
| <i>cis</i> -Pinonic acid                         | C <sub>10</sub> H <sub>16</sub> O <sub>3</sub> | <i>cis</i> -Pinonic acid |                                                |        | 26.1                |        |
| Pinic acid                                       | C <sub>9</sub> H <sub>14</sub> O <sub>4</sub>  | Pinic acid               |                                                |        | 23.9                |        |
| 3-Methyl-1,2,3-butantricarboxylic acid           | C <sub>8</sub> H <sub>12</sub> O <sub>6</sub>  | <i>cis</i> -Pinonic acid | C <sub>10</sub> H <sub>16</sub> O <sub>3</sub> | 60     | 26.1                | 65.4   |
| 3-Hydroxyglutaric acid                           | C <sub>5</sub> H <sub>8</sub> O <sub>5</sub>   | <i>cis</i> -Pinonic acid | C <sub>10</sub> H <sub>16</sub> O <sub>3</sub> | 95     | 26.1                | 98.5   |
| 3-Hydroxy-4,4-dimethylglutaric acid              | C <sub>7</sub> H <sub>12</sub> O <sub>5</sub>  | <i>cis</i> -Pinonic acid | C <sub>10</sub> H <sub>16</sub> O <sub>3</sub> | 65     | 26.1                | 70.0   |
| <i>cis</i> -2-Methyl-1,3,4-trihydroxy-1-butene   | C <sub>5</sub> H <sub>10</sub> O <sub>3</sub>  | Erythritol               | C <sub>4</sub> H <sub>10</sub> O <sub>4</sub>  | 85     | 9.2                 | 85.5   |
| 3-Methyl-2,3,4-trihydroxy-1-butene               | C <sub>5</sub> H <sub>10</sub> O <sub>3</sub>  | Erythritol               | C <sub>4</sub> H <sub>10</sub> O <sub>4</sub>  | 85     | 9.2                 | 85.5   |
| <i>trans</i> -2-Methyl-1,3,4-trihydroxy-1-butene | C <sub>5</sub> H <sub>10</sub> O <sub>3</sub>  | Erythritol               | C <sub>4</sub> H <sub>10</sub> O <sub>4</sub>  | 85     | 9.2                 | 85.5   |
| 2-Methylglyceric acid                            | C <sub>4</sub> H <sub>8</sub> O <sub>4</sub>   | Erythritol               | C <sub>4</sub> H <sub>10</sub> O <sub>4</sub>  | 20     | 9.2                 | 22.0   |
| 2-Methylthreitol                                 | C <sub>5</sub> H <sub>12</sub> O <sub>4</sub>  | Erythritol               | C <sub>4</sub> H <sub>10</sub> O <sub>4</sub>  | 15     | 9.2                 | 17.6   |
| 2-Methylerythritol                               | C <sub>5</sub> H <sub>12</sub> O <sub>4</sub>  | Erythritol               | C <sub>4</sub> H <sub>10</sub> O <sub>4</sub>  | 15     | 9.2                 | 17.6   |
| β-Caryophyllenic acid                            | C <sub>13</sub> H <sub>20</sub> O <sub>4</sub> | Pinic acid               | C <sub>9</sub> H <sub>14</sub> O <sub>4</sub>  | 120    | 23.9                | 122.4  |
| 2,3-Dihydroxy-4-oxopentanoic acid                | C <sub>5</sub> H <sub>8</sub> O <sub>5</sub>   | Azelaic acid             | C <sub>9</sub> H <sub>16</sub> O <sub>4</sub>  | 90     | 12.8                | 90.9   |

<sup>a</sup> ER is the difference between 100% and mean recovery of each surrogate standard.

Table S3 Uncertainties using different ratios from other studies for biomass burning estimation

|              |         | Lev/OC ratios |       |       |       |       |       |
|--------------|---------|---------------|-------|-------|-------|-------|-------|
|              |         | 8.14%         | 8.27% | 7.94% | 14.0% | 12.0% | 10.1% |
| Pre-monsoon  | Average | 28.5          | 28.0  | 29.2  | 16.6  | 19.3  | 23.0  |
|              | Stdev   | 10.3          | 10.1  | 10.5  | 5.96  | 6.96  | 8.29  |
|              | Median  | 28.0          | 27.5  | 28.7  | 16.3  | 19.0  | 22.6  |
| Monsoon      | Average | 17.7          | 17.4  | 18.2  | 10.3  | 12.0  | 14.3  |
|              | Stdev   | 5.11          | 5.03  | 5.24  | 2.97  | 3.47  | 4.13  |
|              | Median  | 17.2          | 16.9  | 17.6  | 9.99  | 11.7  | 13.9  |
| Post-monsoon | Average | 36.3          | 35.8  | 37.3  | 21.1  | 24.7  | 29.4  |
|              | Stdev   | 10.4          | 10.3  | 10.7  | 6.07  | 7.08  | 8.44  |
|              | Median  | 32.3          | 31.8  | 33.2  | 18.8  | 21.9  | 26.1  |
| Winter       | Average | 27.9          | 27.5  | 28.6  | 16.2  | 18.9  | 22.6  |
|              | Stdev   | 8.63          | 8.50  | 8.85  | 5.02  | 5.86  | 6.98  |
|              | Median  | 24.9          | 24.5  | 25.5  | 14.5  | 16.9  | 20.1  |
| Annual       | Average | 24.9          | 24.6  | 25.6  | 14.5  | 16.9  | 20.2  |
|              | Stdev   | 10.4          | 10.3  | 10.7  | 6.07  | 7.08  | 8.44  |
|              | Median  | 22.4          | 22.1  | 23.0  | 13.0  | 15.2  | 18.1  |

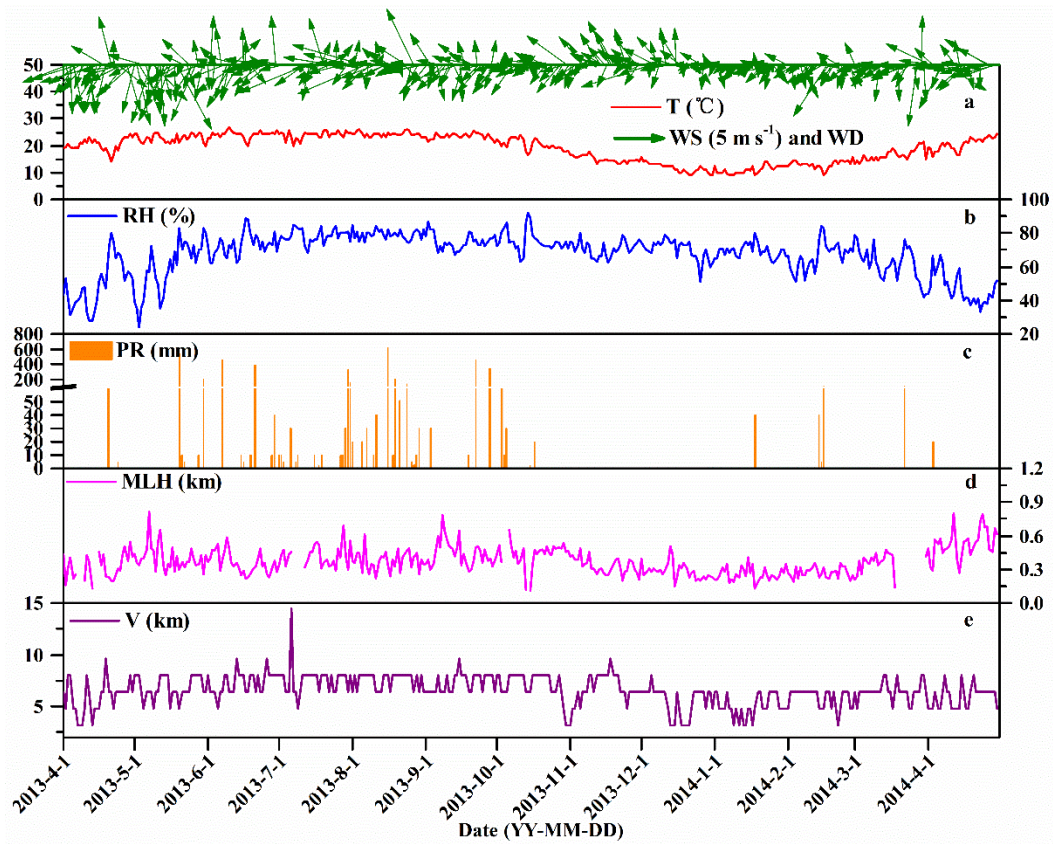

57

58 **Fig. S1.** Temporal variations of (a) wind speed (WS), wind direction (WD), temperature (T), (b) relative  
 59 humidity (RH), (c) precipitation (PR), and (e) visibility (V) monitored at Tribhuvan International Airport  
 60 and (d) mixing layer height (MLH) from Vaisala ceilometer at Bode site, Kathmandu Valley from April  
 61 2013 to April 2014.

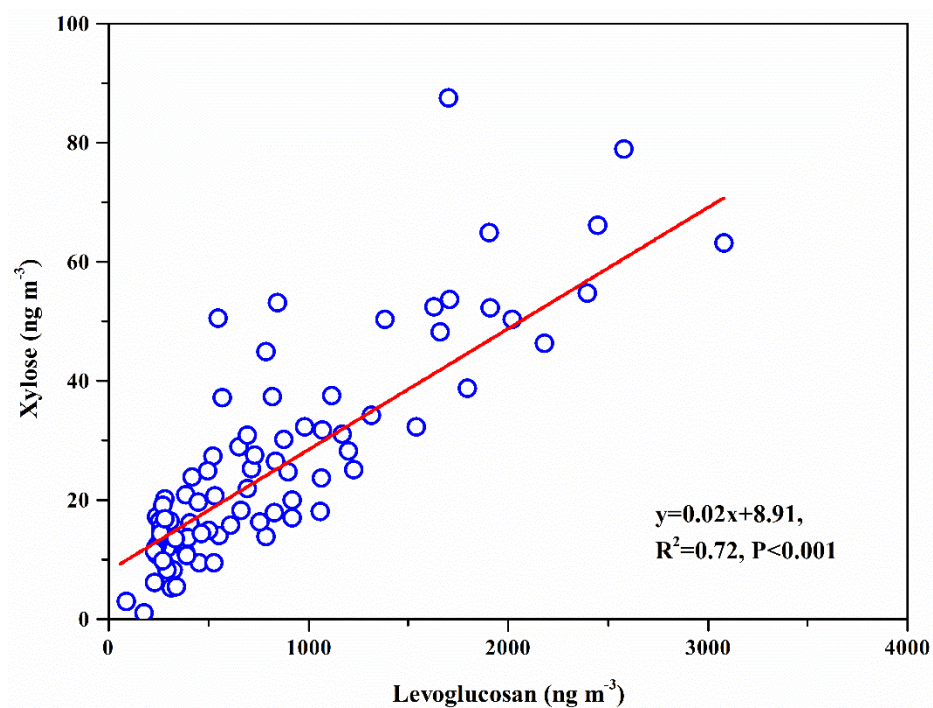

62

63 **Fig. S2.** Correlations between levoglucosan and xylose during the sampling period (April 2013 to April  
64 2014).

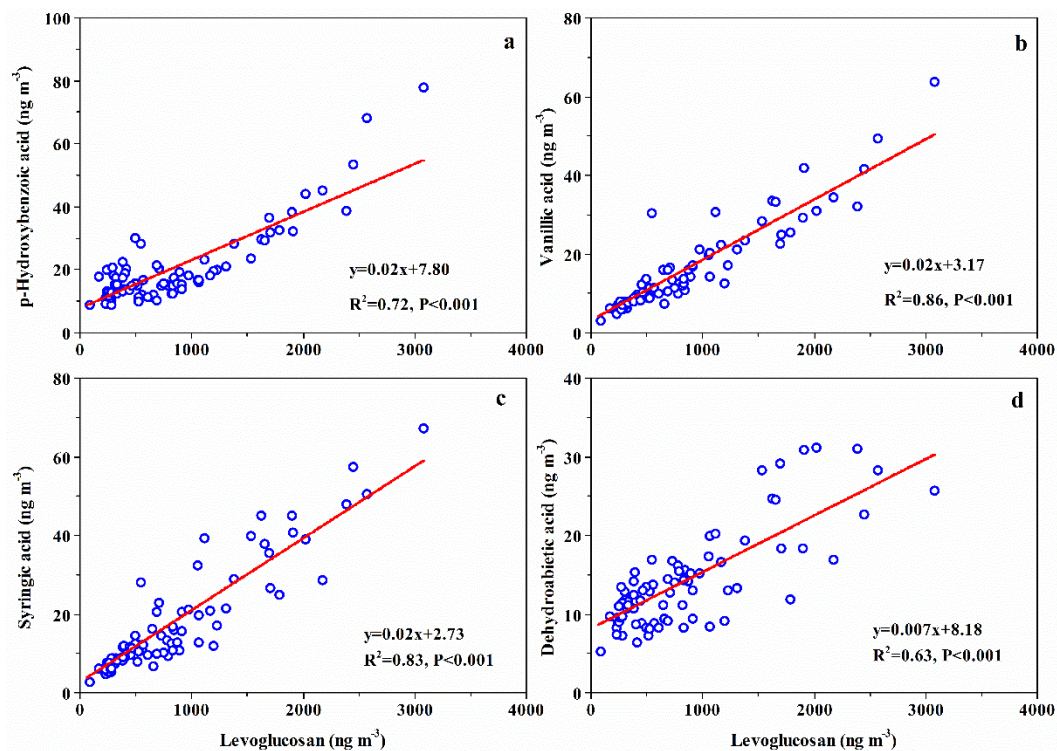

65

66 **Fig. S3.** Correlations between (a) levoglucosan and *p*-hydroxybenzoic acid, (b) levoglucosan and vanillic  
 67 acid, (c) levoglucosan and syringic acid, (d) levoglucosan and dehydroabietic acid in Bode aerosols during  
 68 the whole year (April 2013 to April 2014).

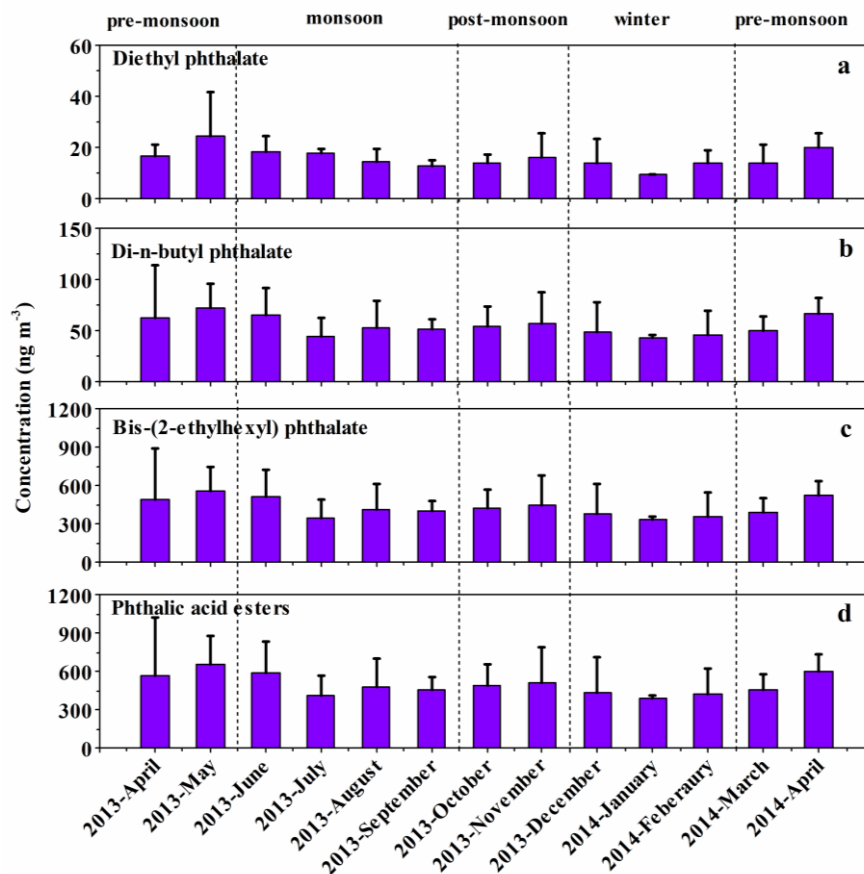

69

70 **Fig. S4.** Monthly variations of phthalic acid esters at Bode site, Kathmandu Valley during April 2013-  
 71 April 2014.

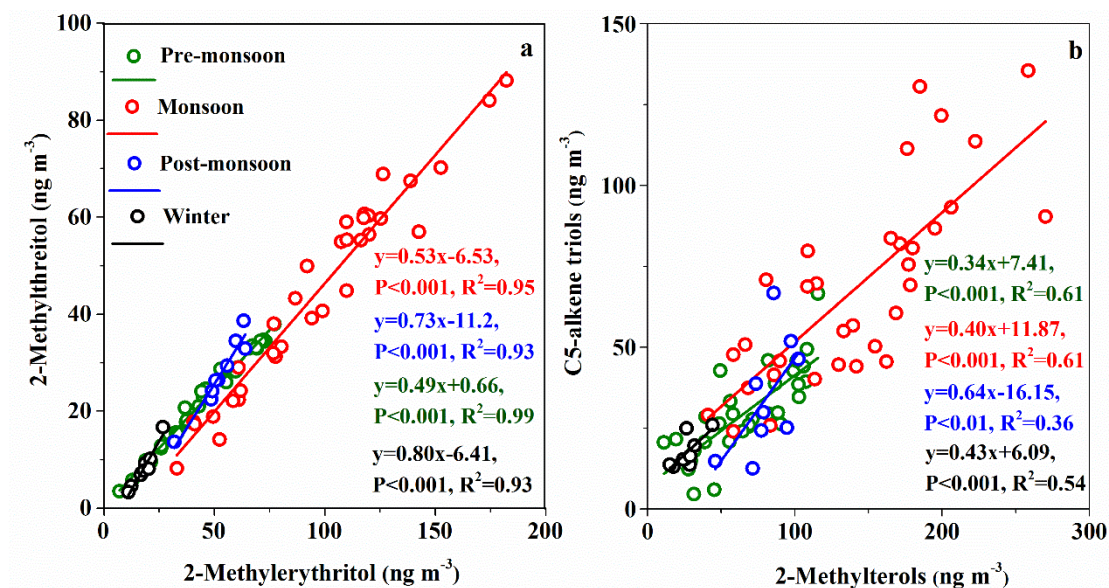

72

73 **Fig. S5.** Correlations between (a) 2-methylthreitol and 2-methylethritol, (b) C5-alkene triols and 2-  
 74 methylterols in Bode aerosols during the sampling period (April 2013 to April 2014).

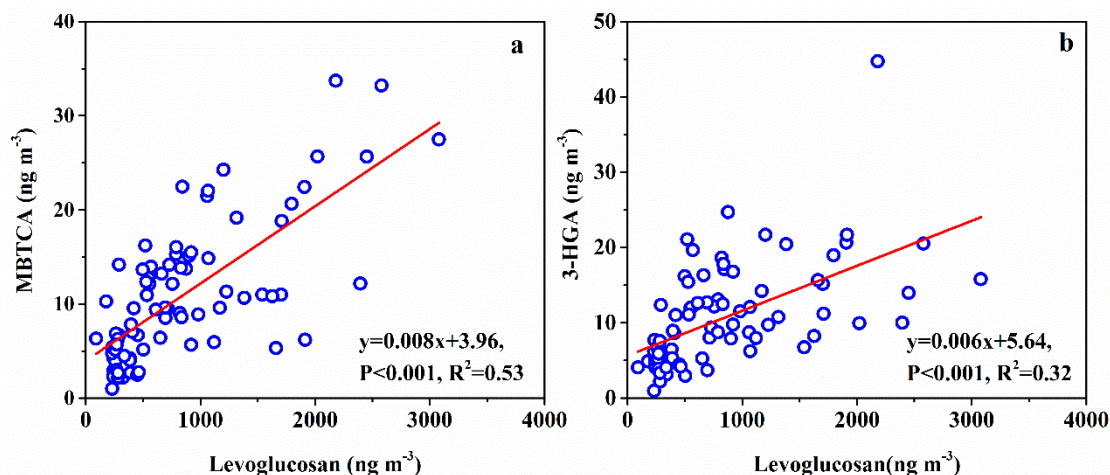

75

76 **Fig. S6.** Correlations between (a) MBTCA and levoglucosan, (b) 3-HGA and levoglucosan in Bode  
 77 aerosols during the sampling period (April 2013 to April 2014).

## 78 References

- 79 Bonvalot, L., Tuna, T., Fagault, Y., Jaffrezo, J.-L., Jacob, V., Chevrier, F., and Bard, E.: Estimating contributions  
 80 from biomass burning, fossil fuel combustion, and biogenic carbon to carbonaceous aerosols in the Valley  
 81 of Chamonix: a dual approach based on radiocarbon and levoglucosan, *Atmospheric Chemistry and*  
 82 *Physics*, 16, 13753-13772, 10.5194/acp-16-13753-2016, 2016.
- 83 Gilardoni, S., Vignati, E., Cavalli, F., Putaud, J. P., Larsen, B. R., Karl, M., Stenström, K., Genberg, J., Henne, S.,  
 84 and Dentener, F.: Better constraints on sources of carbonaceous aerosols using a combined  $^{14}\text{C}$  – macro  
 85 tracer analysis in a European rural background site, *Atmospheric Chemistry and Physics*, 11, 5685-5700,  
 86 10.5194/acp-11-5685-2011, 2011.
- 87 Liu, J., Li, J., Liu, D., Ding, P., Shen, C., Mo, Y., Wang, X., Luo, C., Cheng, Z., Szidat, S., Zhang, Y., Chen, Y., and  
 88 Zhang, G.: Source apportionment and dynamic changes of carbonaceous aerosols during the haze bloom-  
 89 decay process in China based on radiocarbon and organic molecular tracers, *Atmospheric Chemistry and*  
 90 *Physics*, 16, 2985-2996, 10.5194/acp-16-2985-2016, 2016.
- 91 Salma, I., Nemeth, Z., Weidinger, T., Maenhaut, W., Claeys, M., Molnar, M., Major, I., Ajtai, T., Utry, N., and  
 92 Bozoki, Z.: Source apportionment of carbonaceous chemical species to fossil fuel combustion, biomass  
 93 burning and biogenic emissions by a coupled radiocarbon-levoglucosan marker method, *Atmospheric*  
 94 *Chemistry and Physics*, 17, 13767-13781, 10.5194/acp-17-13767-2017, 2017.
- 95 Sheesley, R. J., Nallathamby, P. D., Surratt, J. D., Lee, A., Lewandowski, M., Offenberg, J. H., Jaoui, M., and  
 96 Kleindienst, T. E.: Constraints on primary and secondary particulate carbon sources using chemical tracer  
 97 and  $\text{C-14}$  methods during CalNex-Bakersfield, *Atmospheric Environment*, 166, 204-214,  
 98 10.1016/j.atmosenv.2017.07.025, 2017.

99 Zhang, Y. L., Huang, R. J., El Haddad, I., Ho, K. F., Cao, J. J., Han, Y. M., Zotter, P., Bozzetti, C., Daellenbach, K.,  
100 and Canonaco, F.: Fossil vs. non-fossil sources of fine carbonaceous aerosols in four Chinese cities during  
101 the extreme winter haze episode of 2013, *Atmospheric Chemistry and Physics*, 15, 1299-1312, 2015.

102
